# Supplementary material for: Discovery of a super-strong promoter enables efficient production of heterologous proteins in cyanobacteria
Source: PubMed Central journal article supplement — Sci Rep. 2014 Mar 28;4:4500. doi: 10.1038/srep04500 (PMC3968457; doi:10.1038/srep04500), 2014-03-28
Supplement: srep04500-s1.pdf [file srep04500-s1.pdf]

## Supplementary Information

# Discovery of a super-strong promoter enables efficient production of heterologous proteins in cyanobacteria

Jie Zhou, Haifeng Zhang, Hengkai Meng, Yan Zhu, Guanhui Bao, Yanping Zhang, Yin Li<sup>\*</sup>, Yanhe Ma

### Table of Contents

- I. **Table S1.** Transcription factor binding sites located in upstream of the initiation codon of *cpcB* gene.
- II. **Table S2.** Strains and plasmids used in this study.
- III. **Table S3.** Primers used in this study.
- IV. **Fig. S1.** *Synechocystis* codon optimized version of *ter* gene from *T. denticola*.
- V. **Fig. S2.** RT-PCR confirmation of transcription of *ter* gene from P<sub>cpc374</sub> and P<sub>cpc560</sub>.
- VI. **Fig. S3.** Schematic diagram of construction of expression vectors.

**Table S1** Transcription factor binding sites located in upstream of the initiation codon of *cpcB* gene.

| TFBS (Species)                                                  | Start Position | End Position | Score | Sequence                        |
|-----------------------------------------------------------------|----------------|--------------|-------|---------------------------------|
| igB (N14)   <i>Bacillus subtilis</i> (strain 168)               | 381            | 412          | 13.3  | CGTGTTTCTCCCTGGATTATTTAGGTAATAT |
| H-NS   <i>Escherichia coli</i> (strain K12)                     | 393            | 402          | 5.56  | TGGATTTATT                      |
| Crp   <i>Escherichia coli</i> (strain K12)                      | 402            | 423          | 6.52  | TTAGGTAATATCTCTCATAAAT          |
| YhiX   <i>Escherichia coli</i> (strain K12)                     | 402            | 419          | 6.29  | TTAGGTAATATCTCTCAT              |
| SigE (-35)   <i>Bacillus subtilis</i> (strain 168)              | 405            | 415          | 3.42  | GGTAATATCTC                     |
| NarL   <i>Pseudomonas aeruginosa</i> (strain ATCC 15692 / PAO1) | 410            | 416          | 5.28  | TATCTCT                         |
| PvdS   <i>Pseudomonas aeruginosa</i> (strain ATCC 15692 / PAO1) | 417            | 425          | 6.22  | CATAAATCC                       |
| Fur   <i>Pseudomonas aeruginosa</i> (strain ATCC 15692 / PAO1)  | 443            | 461          | 8.73  | GTTAATGGAGATCAGTAAC             |
| IHF / <i>Escherichia coli</i> (strain K12)                      | 473            | 488          | 5.95  | GGTCATTACTTTGGAC                |
| PucR / <i>Bacillus subtilis</i> (strain 168)                    | 478            | 488          | 3.59  | TTACTTTGGAC                     |
| SigB (-10)   <i>Bacillus subtilis</i> (strain 168)              | 503            | 514          | 5.78  | CGGGGAATTGT                     |
| SigH (-10)   <i>Bacillus subtilis</i> (strain 168)              | 505            | 514          | 7.15  | GGGGAATTGT                      |
| OxyR   <i>Escherichia coli</i> (strain K12)                     | 516            | 526          | 2.9   | TTAAGAAAAT                      |
| SigH (-35)   <i>Bacillus subtilis</i> (strain 168)              | 545            | 556          | 7.88  | GTAGGAGATTAA                    |

**Table S2** Strains and plasmids used in this study.

| Strains and plasmids                  | Relevant characteristics                                                                                                                                        | Reference        |
|---------------------------------------|-----------------------------------------------------------------------------------------------------------------------------------------------------------------|------------------|
| <b>Strains</b>                        |                                                                                                                                                                 |                  |
| <i>E. coli</i> /DH5                   | Commercial transformation host for cloning                                                                                                                      | Takara Co., Ltd. |
| Cyanobacteria                         |                                                                                                                                                                 |                  |
| <i>S.</i> 6803                        | <i>Synechocystis</i> sp. PCC 6803 wild-type                                                                                                                     | D.J. Shi         |
| $\Delta$ pta                          | pta::Km <sup>r</sup>                                                                                                                                            | This study       |
| $\Delta$ pta::P <sub>cpc560</sub> ter | pta::P <sub>cpc560</sub> terT <sub>rbcl</sub> ::Km <sup>r</sup>                                                                                                 | This study       |
| $\Delta$ pta::P <sub>cpc374</sub> ter | pta::P <sub>cpc374</sub> terT <sub>rbcl</sub> ::Km <sup>r</sup>                                                                                                 | This study       |
| $\Delta$ pta::DldhE                   | pta::Km <sup>r</sup> ::P <sub>cpc560</sub> DldhET <sub>rbcl</sub>                                                                                               | This study       |
| <b>Plasmids</b>                       |                                                                                                                                                                 |                  |
| pSM2                                  | pMD18-T derivate, Amp <sup>r</sup> Km <sup>r</sup> , containing <i>pta</i> knockout cassette                                                                    | 1                |
| pSM2-P <sub>cpc560</sub> ter          | pMD18-T derivate, Amp <sup>r</sup> Km <sup>r</sup> , containing <i>pta</i> knockout cassette and P <sub>cpc560</sub> terT <sub>rbcl</sub> expression cassette   | This study       |
| pSM2-P <sub>cpc374</sub> ter          | pMD18-T derivate, Amp <sup>r</sup> Km <sup>r</sup> , containing <i>pta</i> knockout cassette and P <sub>cpc374</sub> terT <sub>rbcl</sub> expression cassette   | This study       |
| pSM2- P <sub>cpc560</sub> DldhE       | pMD18-T derivate, Amp <sup>r</sup> Km <sup>r</sup> , containing <i>pta</i> knockout cassette and P <sub>cpc560</sub> DldhET <sub>rbcl</sub> expression cassette | This study       |

*Abbreviations:* Amp<sup>r</sup>, ampicillin resistance; Km<sup>r</sup>, kanamycin resistance.

Ref. 1. Zhou J., et. al. Designing and creating a modularized synthetic pathway in cyanobacterium *Synechocystis* enables production of acetone from carbon dioxide. *Metab Eng* **14**, 394-400 (2012).

**Table S3** Primers used in this study.

| Primers                     | Sequence (5'-3')                                       | Used for plasmid                                                 |
|-----------------------------|--------------------------------------------------------|------------------------------------------------------------------|
| P <sub>cpc560</sub> F(XhoI) | CTGACT <b>CTCGAG</b> ACCTGTAGAGAAGAGTCCCTGAA           | pSM2-P <sub>cpc560</sub> ter, pSM2-P <sub>cpc560</sub> DldhE     |
| PcpcR(ter)                  | GAACGCTTTG ATCGCATTTA A<br>TGAATTAATCTCCTACTTGACTTTATG | pSM2-P <sub>cpc560</sub> ter                                     |
| TrbcF1                      | ACCGGTGTTTGGATTGTCGG                                   | pSM2-P <sub>cpc560</sub> ter, pSM2-P <sub>cpc560</sub> DldhE     |
| TrbcR1(XhoI)                | CTGACT <b>CTCGAG</b> GCTGTCTGAAGTTGAACATCAG            | pSM2-P <sub>cpc560</sub> ter, pSM2-P <sub>cpc560</sub> DldhE     |
| TerF                        | ATGATTGTGAAACCCATGGT                                   | pSM2-P <sub>cpc374</sub> ter                                     |
| TerR(Trbc)                  | CCGACAATCCAACACCGGTTTAAATGCGATCAAAGCGTTC               | pSM2-P <sub>cpc560</sub> ter                                     |
| Pcpc374F(XhoI)              | CTGACT <b>CTCGAG</b> TCTTCCCTTCCCAATCCAG               | pSM2-P <sub>cpc560</sub> ter                                     |
| DldhEF                      | ATGAAACTCGCCGTTTATAGCA                                 | pSM2-P <sub>cpc374</sub> ter                                     |
| DldhER(Trbc)                | CCGACAATCCAACACCGGTTTAAACCAGTTCGTTCCGGGC               | pSM2-P <sub>cpc560</sub> DldhE                                   |
| PcpcR(DldhE)                | TGCTATAAACGGCGAGTTTCAT<br>TGAATTAATCTCCTACTTGACTTTATG  | pSM2-P <sub>cpc560</sub> DldhE<br>pSM2-P <sub>cpc560</sub> DldhE |

Introduced restriction sites are in bold.

ATGATTGTGAAACCCATGGTGCGCAACAACATTTGTTTGAACGCCACCCCAAGGCTGTAAAA  
AGGCGTGGAAGATCAAATTGAATACACCAAAAAACGCATTACCGCCGAAGTGAAAGCCGGCGCAAAGCCC  
CCAAAAACGTGTTGGTGTGGGCTGTCCAACGGCTACGGCTTGGCTCCCGCATTACCGCCGCTTTGGC  
TACGGCGCCGCCACCATTGGCGTGTCTTTGAAAAAGCCGGCTCCGAAACCAAATACGGCACCCCGGCTG  
GTACAACAATTGGCCTTTGATGAAGCCGCCAACGCGAAGGCTTGTACTCCGTGACCATTGATGGCGATG  
CCTTTCCGATGAAATTAAGCCCAAGTGATTGAAGAAGCCAAAAAAAAGGCATTAATTTGATTTGATT  
GTGTACTCCTTGGCCTCCCGTGGCACCAGTCCCGATACCGGCATTATGCACAAATCCGTGTTGAAACC  
CTTTGGCAAAACCTTTACCGCAAAACCGTGGACCCTTTACCGGCGAATTGAAAGAAATTTCCGCCGAAC  
CCGCCAACGATGAAGAAGCCGCCACCCTGAAAGTGATGGGCGGCGAAGATTGGGAACGCTGGATTA  
CAATTGTCCAAGAAGGCTTGTGGAAGAAGGCTGTATTACCTTGGCCTACTCCTACATTGGCCCCGAAGC  
CACCCAAGCCTGTACCGCAAAGGCACCATTGGCAAAGCCAAAGAACAATTGGAAGCCACCGCCACCCTG  
TGAACAAAGAAAACCCCTCCATTGCGCCTTTGTGTCCGTGAACAAAGGCTTGGTGACCCGCGCCTCCGCC  
GTGATTCCCGTATTCCCTGTACTTGGCCTCCTGTTTAAAGTGATGAAAGAAAAAGGCAACCACGAAGG  
CTGATTGAACAAATTACCCGCTTGTACGCCGAACGCTTGTACCGCAAAGATGGCACCATTCCCGTGGATG  
AAGAAAACCGCATTGCGATTGATGATTGGGAATTGGAAGAAGATGTGCAAAAAGCCGTGTCGCCCTTGATG  
GAAAAAGTGACCGGCGAAAACGCCGAATCCTTGACCGATTGGCCGGCTACCGCCACGATTTTTGGCCTC  
CAACGGCTTTGATGTGGAAGGCATTAACACGAAGCCGAAGTGAACGCTTTGATCGCATTAA

**Fig. S1.** *Synechocystis* codon optimized version of *terg* gene from *T. denticola*. Start and stop codons are also indicated.

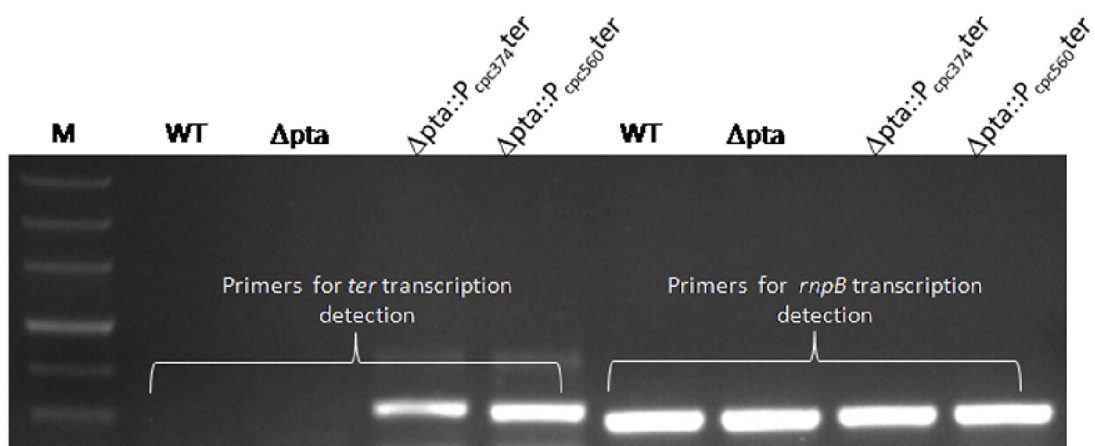

**Fig. S2.** RT-PCR confirmation of transcription of *ter* gene from P<sub>cpc374</sub> and P<sub>cpc560</sub>. Total RNA of *S. 6803* wild-type (WT),  $\Delta$ pta,  $\Delta$ pta::P<sub>cpc374</sub>*ter* and  $\Delta$ pta::P<sub>cpc560</sub>*ter* cells was isolated using Redzol reagent (Qiagen, Beijing, China). Residual DNA in RNA preparations was eliminated by digestion with RNase-free DNase and reverse transcription reactions were performed using Reverse Transcription kit (Qiagen, Beijing, China). Reverse transcription products were amplified by PCR and analyzed by electrophoresis on 1.2% (w/v) agarose gels. M was DNA marker III. Transcription of *rnpB* was used as a positive control.

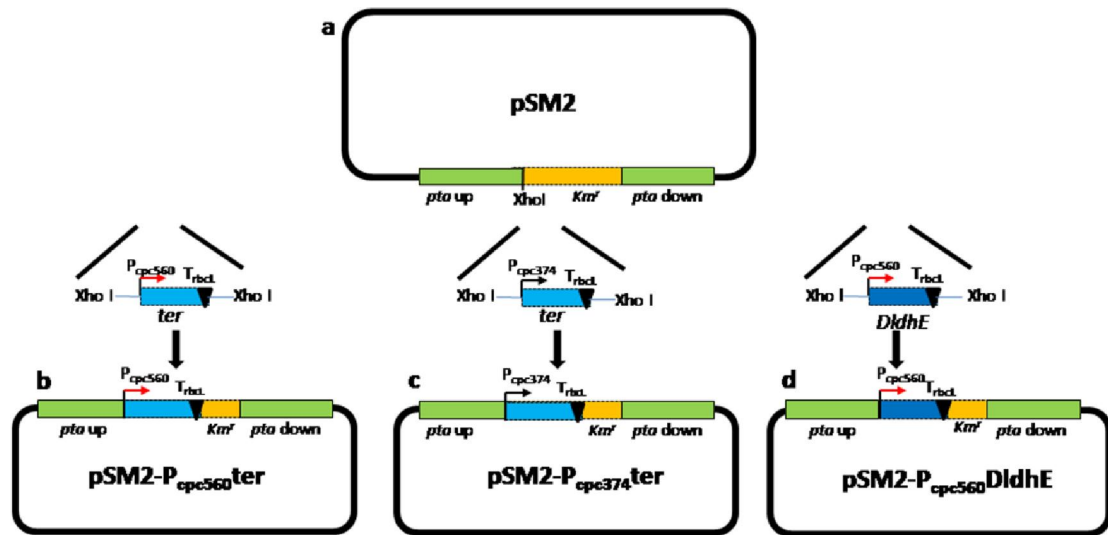

Fig. S3. Schematic diagram of construction of expression vectors.
